# Supplementary material
Source: publisher figshare collection journal article supplement (https://acs.figshare.com/ndownloader/files/26428287)
Supplement: Supplementary file 1 [file 26428287]

*Supplementary Information for*

**Charge manipulation using solution and gas-phase chemistry to facilitate analysis of highly heterogeneous protein complexes in native mass spectrometry**

Yang Yang, Chendi Niu, Cedric E. Bobst, and Igor A. Kaltashov

*Department of Chemistry, University of Massachusetts-Amherst, 240 Thatcher Road, Amherst, MA 01003*

**Contents**

**Figure S1.** Top: the amino acid sequence of human haptoglobin pre-protein (P00738). The sequences of the light (L) and heavy (H) chains are highlighted in blue and red, respectively. The segment highlighted in purple corresponds to the additional insert present in the light chain L\*. The black brackets show the disulfide bonds; arrows indicate the external disulfide bonds (L-L, L-L\* and L\*-L\*). Bottom: schematic representations of the quaternary organization of haptoglobin oligomers.

**Figure S2.** ESI mass spectra of 5  $\mu$ M aqueous (150 mM ammonium acetate) solution of *hTf* before (the blue trace) and after modifying the solvent with 6% mNBA (the red trace). The “supercharged” protein ions at charge state +29 were isolated (the black trace) and subjected to limited charge reduction producing a well-defined ladder extending to the charge state +21 (the purple trace).

**Table S1.** Measured masses of the most abundant ionic species representing different Hp/Hb complexes.



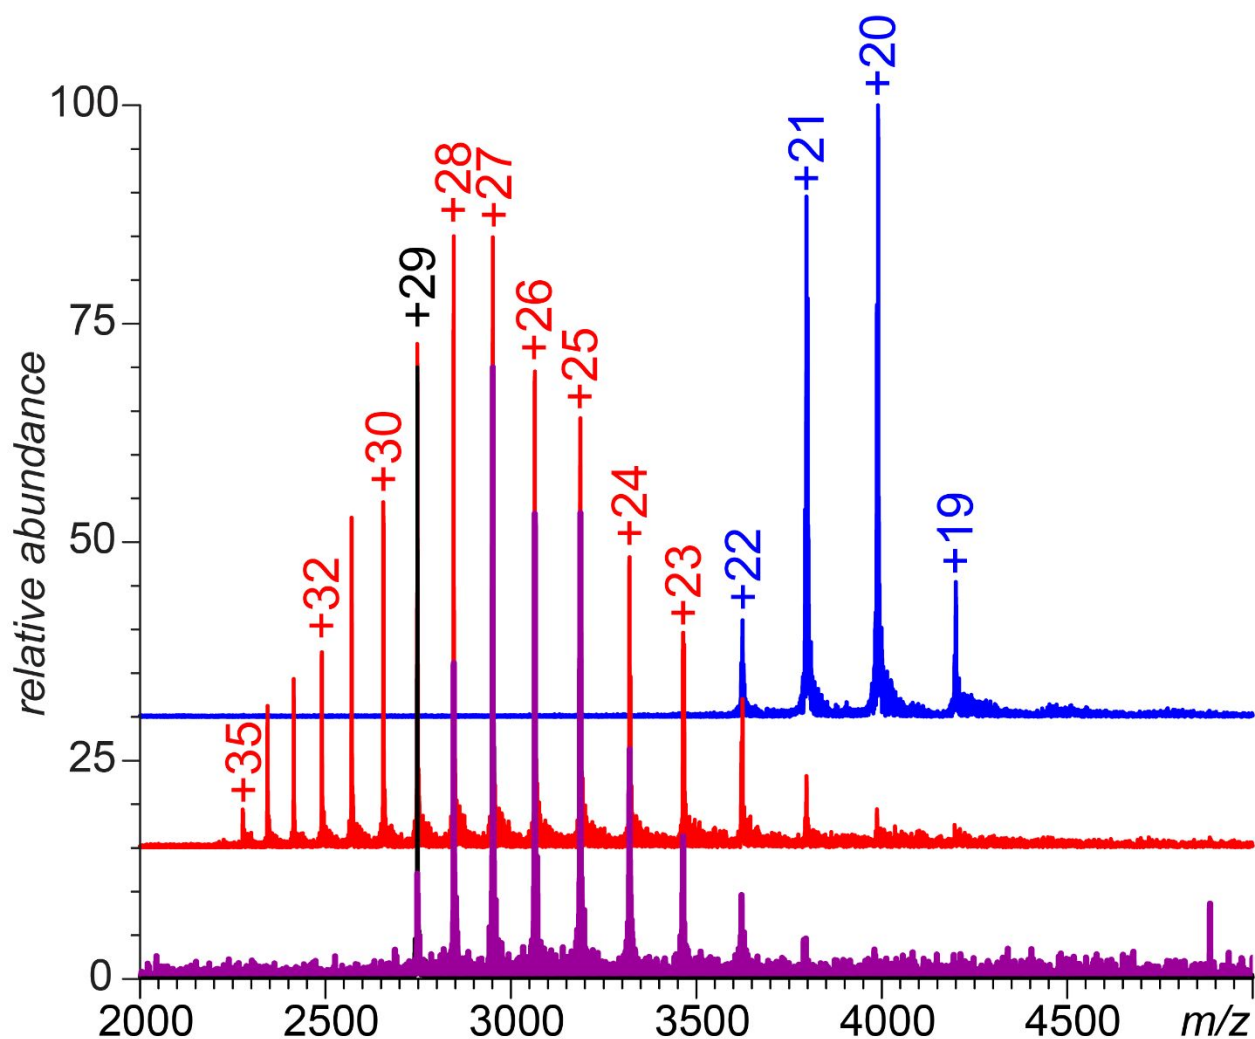

**Figure S2.** ESI mass spectra of 5  $\mu$ M aqueous (150 mM ammonium acetate) solution of hTf before (the blue trace) and after modifying the solvent with 6% mNBA (the red trace). The “supercharged” protein ions at charge state +29 were isolated (the black trace) and subjected to limited charge reduction producing a well-defined ladder extending to the charge state +21 (the purple trace).

**Table S1.** Measured masses of the most abundant ionic species representing different Hp/Hb complexes.

|                                                       | Hp 1-1                                    |                                                      | Hp 2-1                                    |                                                      |
|-------------------------------------------------------|-------------------------------------------|------------------------------------------------------|-------------------------------------------|------------------------------------------------------|
| $(\alpha^*\beta^*)_2\text{H}_2\text{L}_2$             | Expected mass <sup>1.1</sup><br>158.1 kDa | Measured mass<br>w/ supercharging<br><br>160±2.9 kDa | Expected mass <sup>1.1</sup><br>153.9 kDa | Measured mass<br>w/ supercharging<br><br>154±2.5 kDa |
|                                                       | Expected mass <sup>2</sup><br>158.0 kDa   |                                                      | Expected mass <sup>1.2</sup><br>155.9 kDa |                                                      |
| $(\alpha^*\beta^*)_3\text{H}_3\text{L}_2\text{L}^*$   | N/A                                       | N/A                                                  | Expected mass <sup>1.1</sup><br>236.5 kDa | Measured mass<br>w/ supercharging<br><br>241±3.9 kDa |
|                                                       | N/A                                       |                                                      | Expected mass <sup>1.2</sup><br>240.5 kDa |                                                      |
| $(\alpha^*\beta^*)_4\text{H}_4\text{L}_2\text{L}^*_2$ | N/A                                       | N/A                                                  | Expected mass <sup>1.1</sup><br>319.3 kDa | Measured mass<br>w/ supercharging<br><br>336±4.3 kDa |
|                                                       | N/A                                       |                                                      | Expected mass <sup>1.2</sup><br>325.2 kDa |                                                      |

<sup>1.1</sup> Limited charge reduction results provided by Yang, Y.; Pawlowski, J. W.; Carrick, I.; Kaltashov, I. A. Evaluation of the extent of haptoglobin glycosylation using orthogonal intact-mass MS approaches. *ChemRxiv***2020**, doi:10.26434/chemrxiv.13518512.v1.

<sup>1.2</sup> Cross-path reactive chromatography results provided by Yang, Y.; Pawlowski, J. W.; Carrick, I.; Kaltashov, I. A. Evaluation of the extent of haptoglobin glycosylation using orthogonal intact-mass MS approaches. *ChemRxiv***2020**, doi:10.26434/chemrxiv.13518512.v1.

<sup>2</sup> Pawlowski, J. W.; Carrick, I.; Kaltashov, I. A. Integration of On-Column Chemical Reactions in Protein Characterization by Liquid Chromatography/Mass Spectrometry: Cross-Path Reactive Chromatography. *Anal. Chem.***2018**, 90, 1348-1355.
